# Supplementary material
Source: publisher figshare collection journal article supplement (https://acs.figshare.com/ndownloader/files/4591558)

**SUPPORTING INFORMATION AVAILABLE**

Nucleation and Growth of ZnO in organic solvents - An in-situ study

*Carlos Lizandara-Pueyo,<sup>(a)</sup> Maurits W. E. van den Berg,<sup>(b)</sup> Andrea de Toni<sup>(b)</sup> Tobias*

*Goes,<sup>(a)</sup> Sebastian Polarz<sup>(a)</sup>\**

**S-1**

Additional  $^1\text{H}$ -NMR data of selected heterocubanes  $[\text{MeZnOR}]_4$

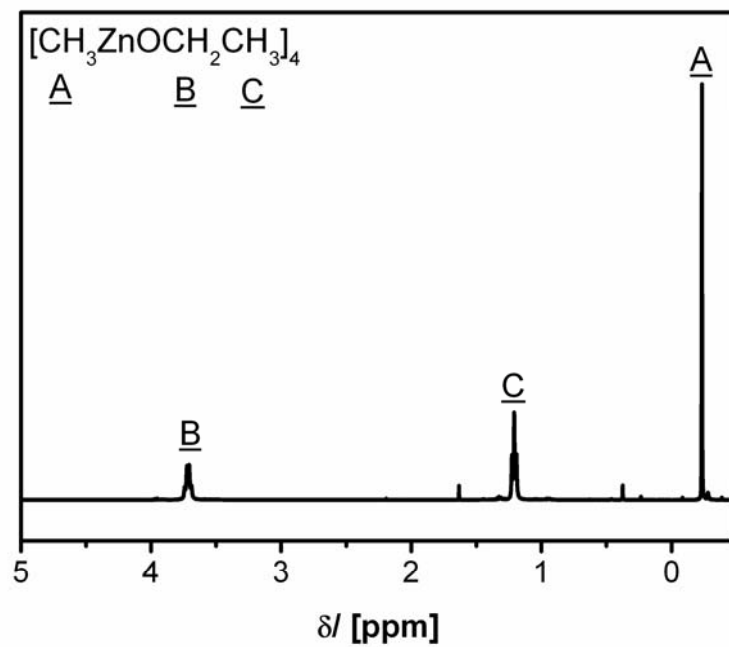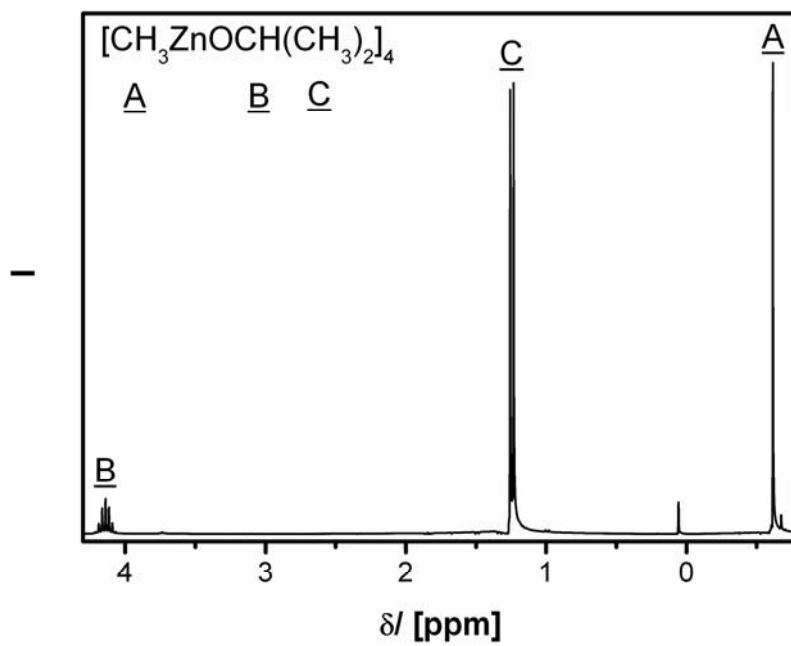

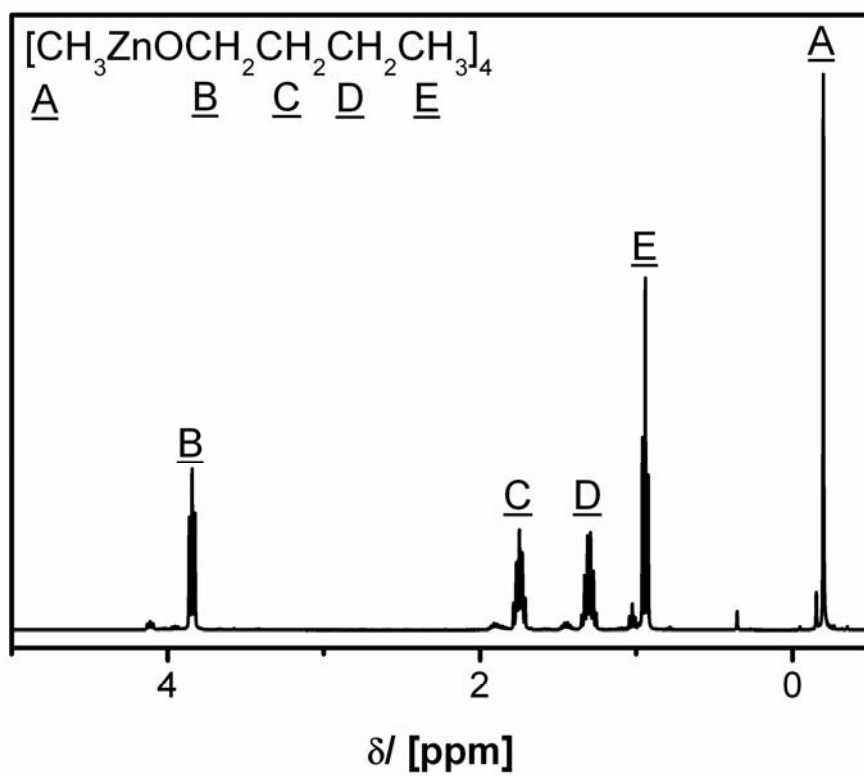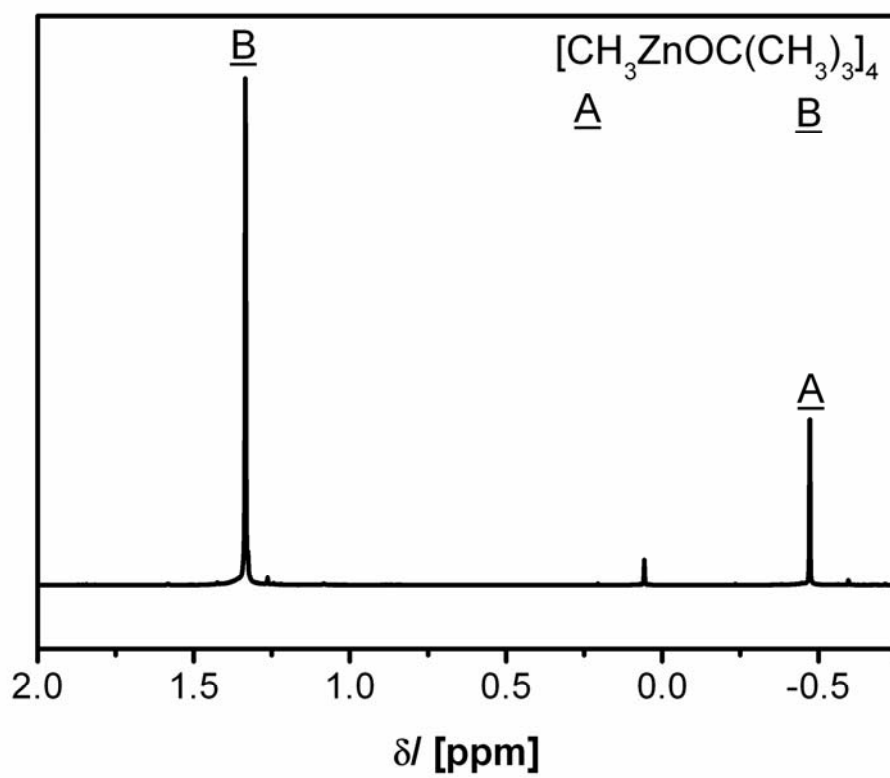

## S-2

Excluded, alternative mechanism for the reaction of heterocubane precursors with water:

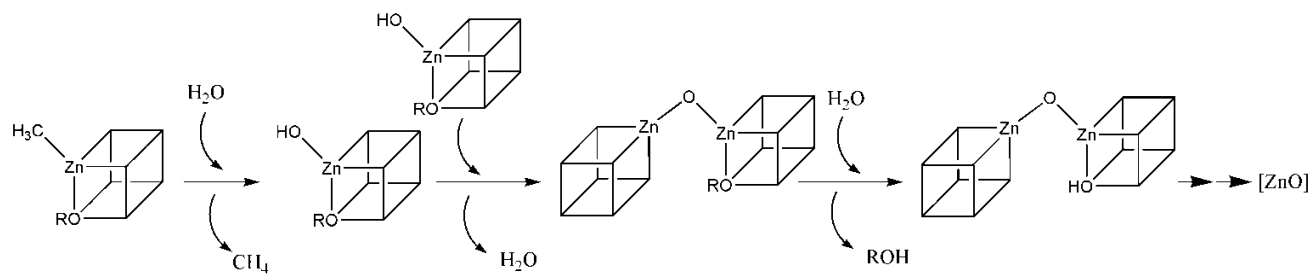

In-situ FT-Raman investigation of the reaction of  $[\text{MeZnO}^{\text{tert}}\text{Bu}]_4$  with water

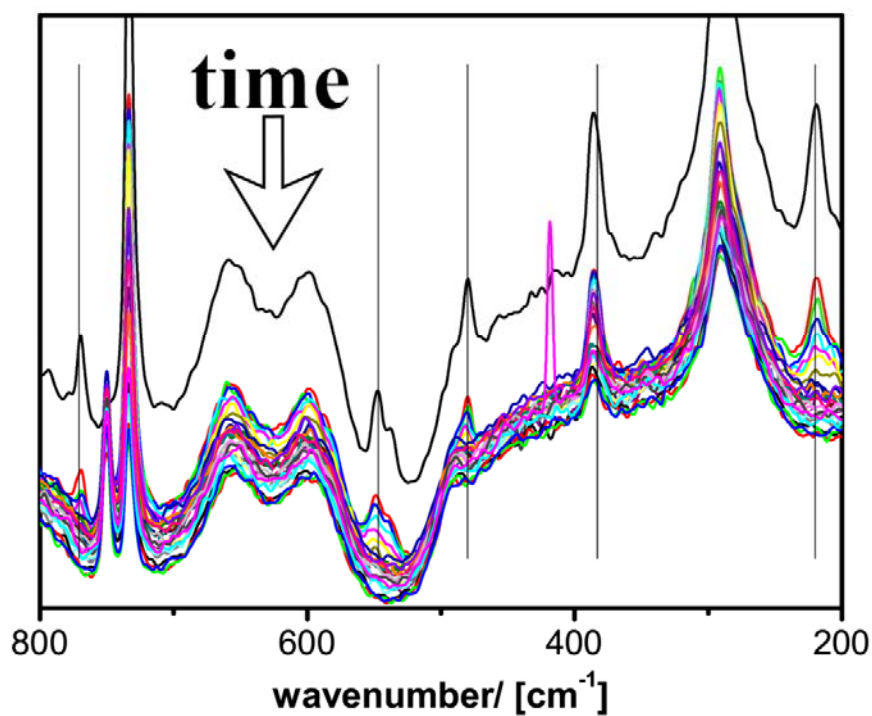

The reaction was performed in THF as a solvent and  $T = 5^\circ\text{C}$ . Therefore, the Raman signals of THF are also seen in the spectra. The spectrum at  $t = 0\text{s}$  is accentuated for better visibility. Raman spectra were recorded every 45s. Bands corresponding to the precursor  $[\text{MeZnO}^{\text{tert}}\text{Bu}]_4$  are marked by the vertical line.

Raman-spectra of molecular, heterocubane precursors and references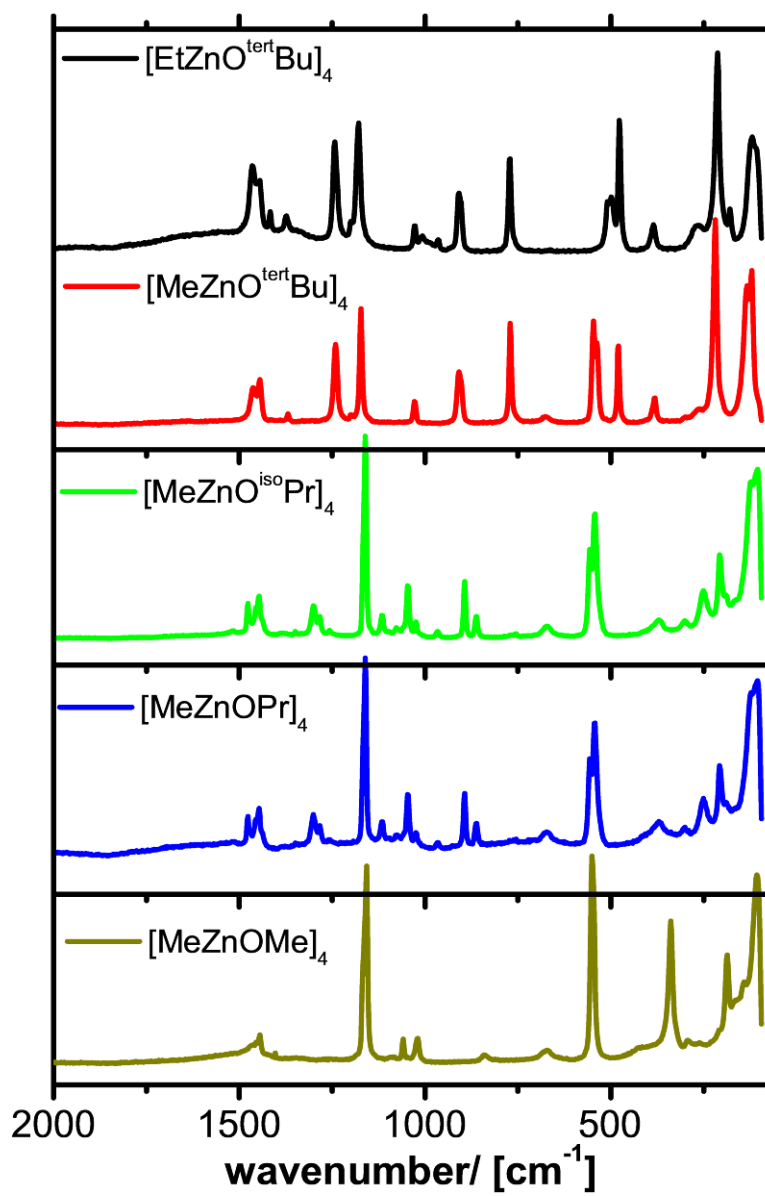

Raman spectra of different heterocubanes precursors

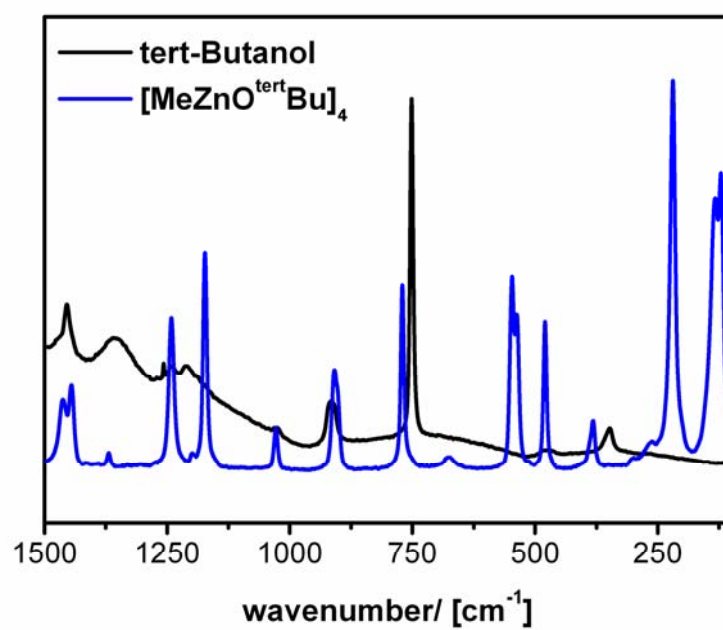

Comparison of the Raman spectrum of tert-butanol with [MeZnO<sup>tert</sup>Bu]<sub>4</sub>.

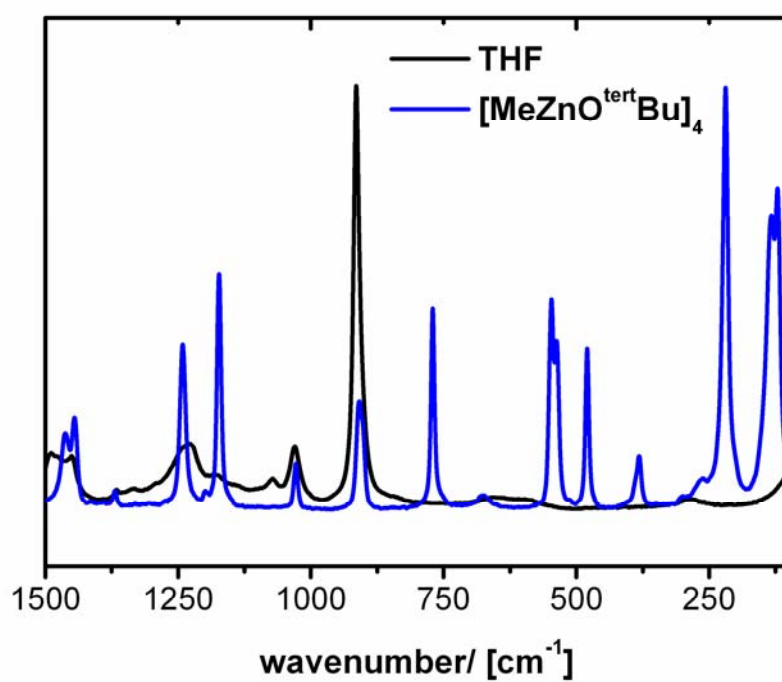

Comparison of the Raman spectrum of THF with [MeZnO<sup>tert</sup>Bu]<sub>4</sub>.

## S-5

### Determination of the extinction coefficient $\varepsilon$ for ZnO in homogeneous THF solution at $\lambda = 325$ nm.

A colloidal solution containing ZnO-particles with average diameter of  $\approx 3$  nm was prepared.<sup>27</sup> A concentration series with  $c(\text{ZnO})$  was prepared:  $c_1 = 1.25 \cdot 10^{-3}$  mol/l,  $c_2 = 6.26 \cdot 10^{-4}$  mol/l,  $c_3 = 3.13 \cdot 10^{-4}$  mol/l,  $c_4 = 1.56 \cdot 10^{-4}$  mol/l. UV-Vis absorption spectra were acquired (see Fig. S-3a), and  $\varepsilon_{\lambda=325\text{nm}}$  was calculated from the slope of a plot of the absorption value at  $\lambda = 325$  nm against  $c(\text{ZnO})$  (see Fig. S-3b).

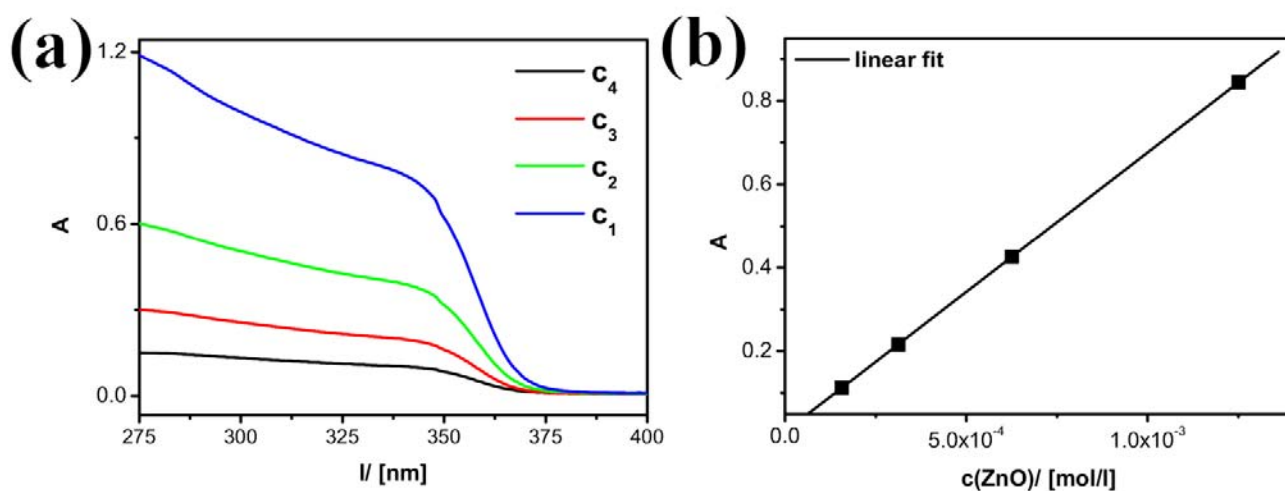



## S-6

### $E_{\text{GAP}}$ versus $D_p$

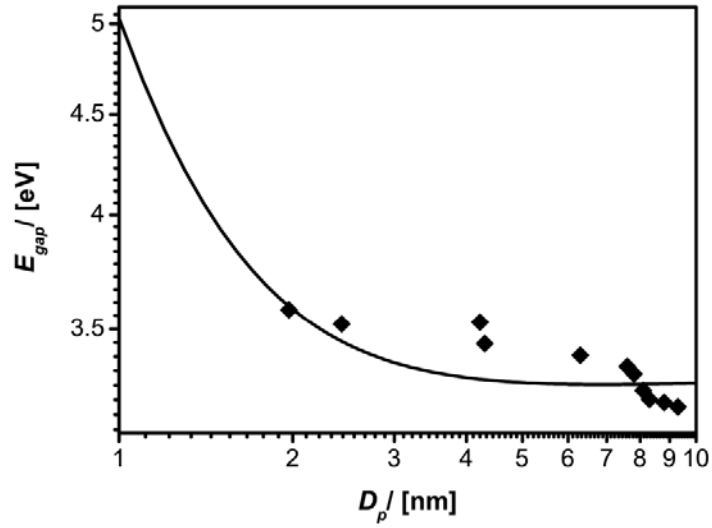

The dependency of  $E_{\text{gap}}$  from ZnO particle size according to the effective mass model by Brus (black curve) and the values determined experimentally from our samples.

### Warren-Averbach evaluation of PXRD data

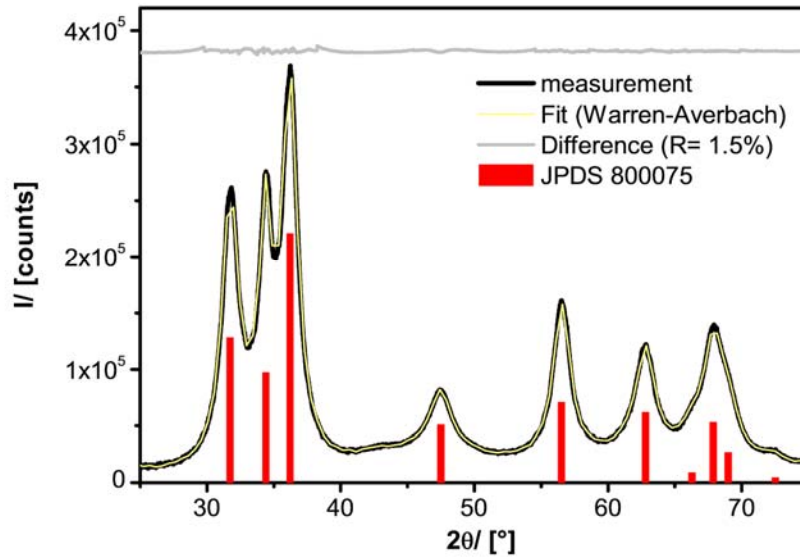

## S-7

Further information on fluorescence spectra

Signal at 367 nm

Signal at 367 nm

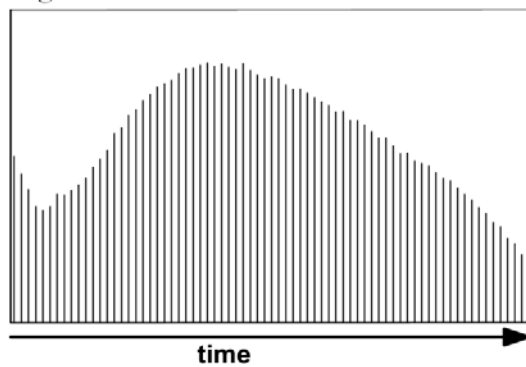

Defect luminescence

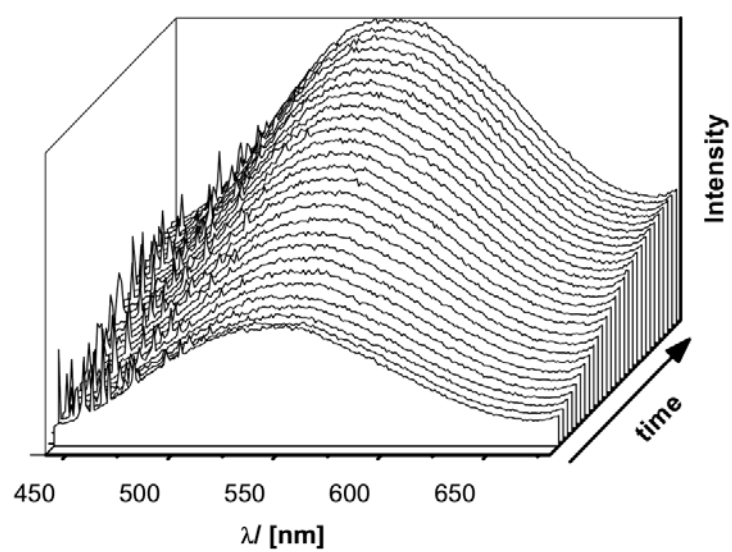

## S-8

### Investigation of ZnO nucleation and growth by TEM

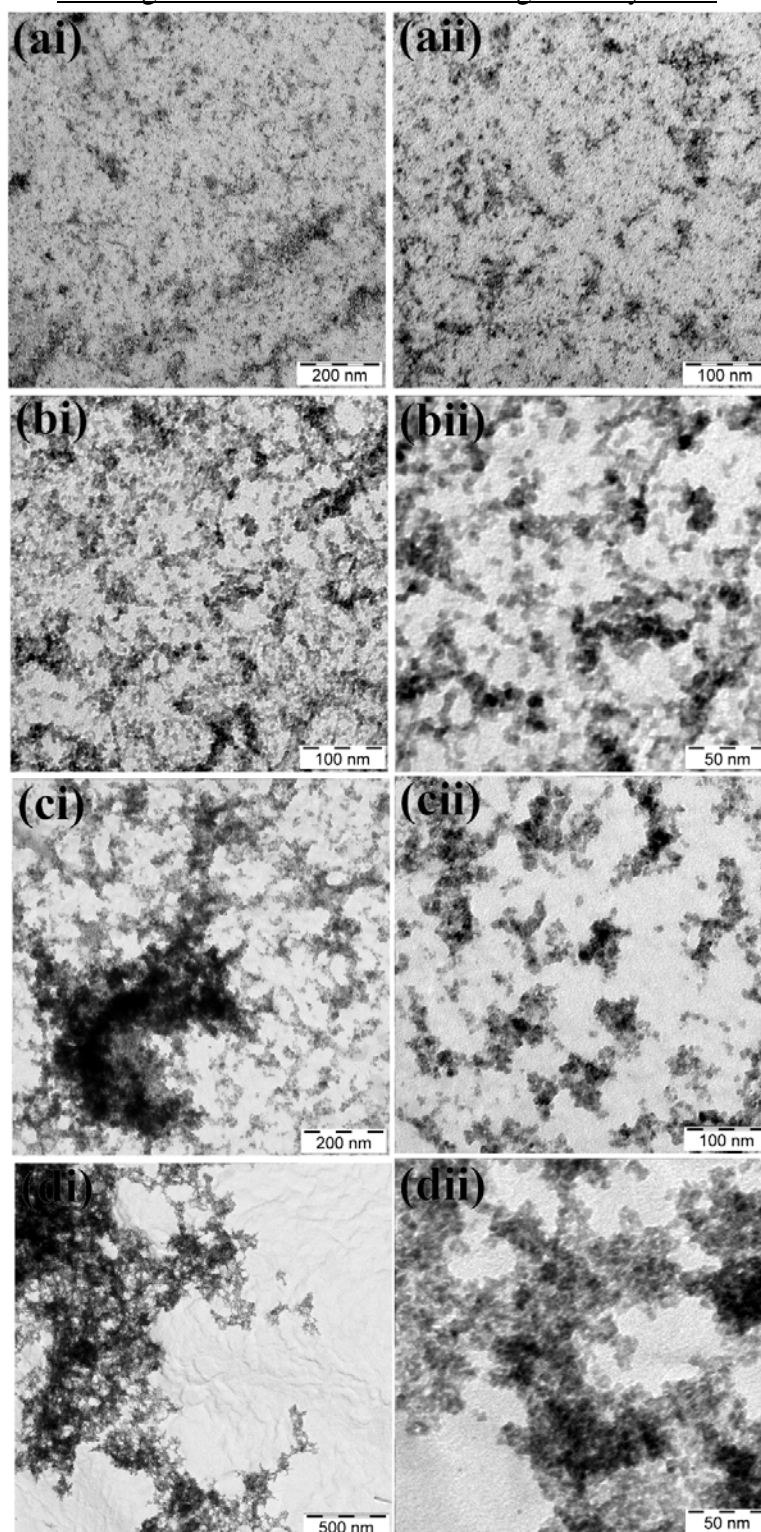

Samples taken at  $t = 30$  min (a),  $t = 43$  min (b),  $t = 66$  min (c),  $t = 78$  min (d). For each sample two different magnifications are shown.

## S-9

The sample-cell used for XAS measurements

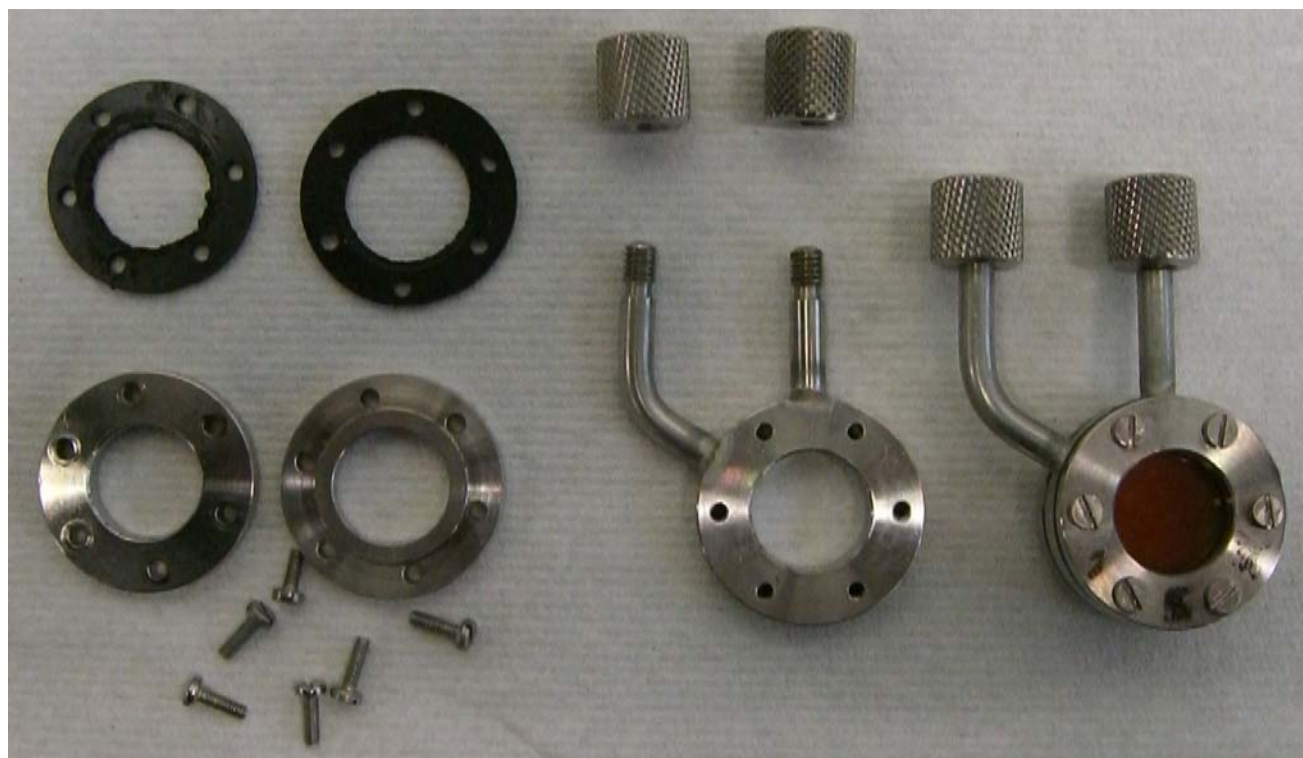

Supplement: Supplementary file 1 [file 4591558]
